# Supplementary material
Source: PubMed Central journal article supplement (PMC7483821)

Uncropped blot for Figure 2h

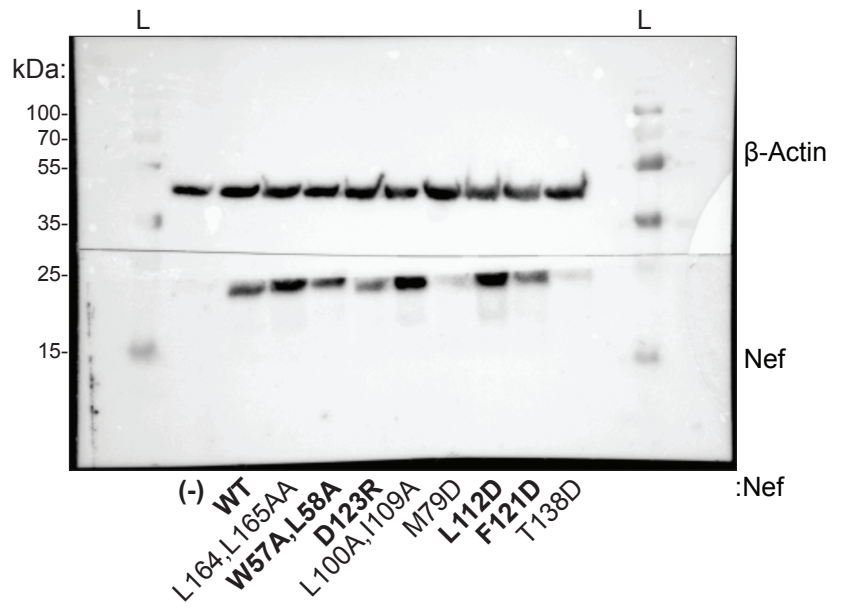

Uncropped blot for Figure 4b

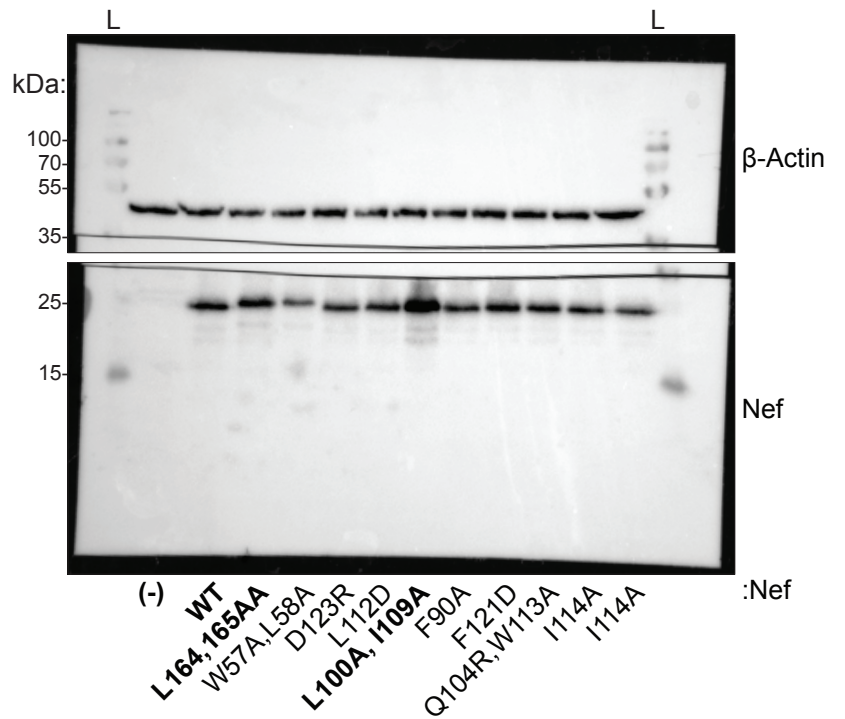

Uncropped blot for Figure 4c

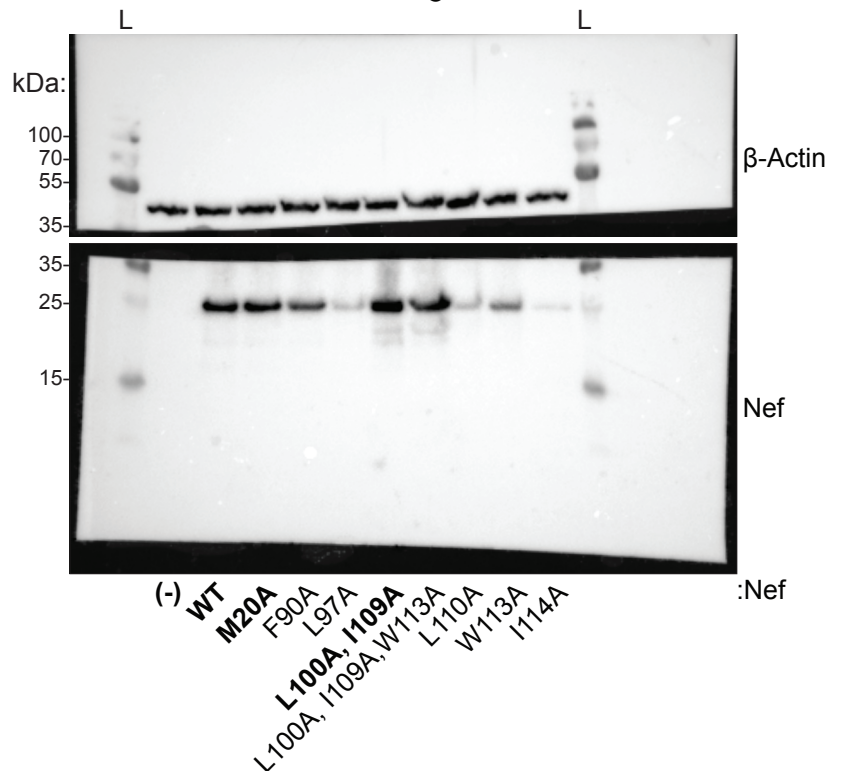

Supplement: NIHMS1604875-supplement-3.pdf [file NIHMS1604875-supplement-3.pdf]
